# Supplementary material
Source: publisher site journal article supplement (https://www.dovepress.com/get_supplementary_file.php?f=340567.docx)
Supplement: Supplementary file 1 [file get_supplementary_file.php]

**Appendix**

**The online distributed full questionnaire of the study survey**

1. Demographics

1. Sex

● female

● male

2. Age (years)

● <18

● 18-24

● 25-34

● 35-44

● 45-54

● >55

3. Educational level (check all that apply)

● Elementary, High school

● College

● University

● Master’s degree

● PhD degree

4. Profession

● medical doctor

● registered nurse

● paramedic

● teacher

● police/ fire person

● other

5. Workplace (for health professionals)

● ICU/CCU

● emergency department

● operating room

● nursing ward

● private practice/ laboratory

● pre-hospital care

● other

6. Time elapsed since your last certified BLS/ERC seminar

● <3 months

● 3-6 months

● 6-12 months

● 1-2 years

● 2-3 years

● >3 years

Β. BLS practice/ CPR today (covid-19 pandemic)

7. How do you believe the ongoing covid-19 pandemic will affect your response when witnessing a cardiac arrest:

● Positively

- I will provide CPR more confidently

● Neutrally

- I will react as always

● Negatively

- I will not risk a possible infection to the Sars-Cov2 virus

8. What will you do in the case of a cardiopulmonary arrest:

● I will immediately commence continuous compressions without rescue breaths, without losing time with putting on PPE

● I will apply all Personal Protective Equipment (PPE) irrespective of the time that will be wasted

● I will avoid being involved in this risky situation

9. Do you believe that performing CPR on a person of your close circle (eg at home, at work etc) with whom you spend a lot of time, essentially increases your chances of contracting Covid-19?

● Yes

● No

10. Automated External Defibrillaton (AED) use on a cardiac arrest victim during the pandemic:

● Is safe, same as in the pre-Covid era

● Is safe only if the rescuers stand at least two meters away from the victim during shock delivery

● Is a clear transmission hob of dangerous airborne droplets during shock delivery

11. CPR training (basic life support - BLS) during the Covid-19 pandemic is realistic and can be safely applied in practice:

● Yes - seminars should and must take place like as before, but with all necessary precautions (correct training)

● Yes - but modifications should be made (less time- fewer participants- distance learning)

● No - it is not possible to apply all precautions in a situation of crowding and physical contact

12. Personal Protective Equipment (PPE) use during CPR on suspected/ confirmed Covid-19 cases can:

● Increase overall survival

● Lower survival when compared to CPR without PPE

● Lower virus transmission without affecting survival

13. Are you aware that the ERC has issued guidelines for modifying resuscitation process during the Covid-19 pandemic and for using personal protective equipment?

● Yes - I have read them

● Yes - but I have not read them

● No

14. Are you aware of the web ERC seminar “Resuscitation practice during the Covid-19 pandemic”? <https://cosy.erc.edu/covid-19-course/>

● Yes

● No

15. Have you watched it?

● Yes

● No

16. Are you aware that the Greek National Public Health Organisation (NPHO), in collaboration with HCS (Hellenic Cardiological Society), has published official instructions for CPR practice during the Covid-19 pandemic? <https://eody.gov.gr/neos-koronaios-covid-19>

● Yes - I have read them

● Yes - but I have not read them

● No

17. What is your opinion on the official ERC CPR guidelines?

● They are clear and concise

● They are clear but have not been adequately communicated

● They are not clear - they are complicated

● They require extensive practice before they can be applied

● They raise safety issues for the rescuer - I do not agree with them

18. Additional CPR training during the pandemic should include, according to your opinion (click all that apply):

● More online training videos

● More online training lectures

● More online seminars

● More live seminars
